# Supplementary material for: Spin Frustrated Pyrazolato Triangular CuII Complex: Structure and Magnetic Properties, an Overview
Source: MDPI journal article supplement (doi:10.3390/magnetochemistry9060155), 2023-06-11
Supplement: s1 [file s1]

## Supporting Information

# Spin Frustrated Pyrazolato Triangular Cu<sup>II</sup> Complex. Structure and Magnetic Properties, an Overview.

Walter Cañón-Mancisidor<sup>1,4\*</sup>, Patricio Hermosilla-Ibáñez<sup>2,3</sup>, Evgenia Spodine<sup>2,4\*</sup>, Verónica Paredes-García<sup>2,5</sup>, Carlos J. Gómez-García<sup>6</sup>, Diego Venegas-Yazigi<sup>2,3,\*</sup>.

<sup>1</sup> Depto. Matemáticas y Ciencias de la Ingeniería (DMCI), Facultad de Ingeniería, Ciencia y tecnología (FICyT), Universidad Bernardo O'Higgins (UBO), Av. Viel 1497, Santiago, CP-8370993, Chile

<sup>2</sup> Centro para el Desarrollo de la Nanociencia y Nanotecnología, (CEDENNA), USACH, Av. Lib Bernardo O'Higgins 3363, Estación Central, CP-9170022, Chile

<sup>3</sup> Depto. Química de los Materiales, Facultad de Química y Biología, Universidad de Santiago de Chile (USACH), Av. Lib Bernardo O'Higgins 3363, Estación Central, CP-9170022, Chile

<sup>4</sup> Facultad de Ciencias Químicas y Farmacéuticas, Universidad de Chile, Dr. Carlos Lorca Tobar 964, Independencia, CP-8380000 Chile

<sup>5</sup> Departamento de Ciencias Químicas, Universidad Andrés Bello, Republica 275, Santiago, Chile, CP-8370146

<sup>6</sup> Departamento de Química Inorgánica, Universidad de Valencia, C/Dr. Moliner 50, Burjasot, Valencia, Spain, CP-46100

## Table of Contents

|                                                           |     |
|-----------------------------------------------------------|-----|
| 1. Electrospray-Mass Spectrometry <b>1-Cu<sub>3</sub></b> | S2  |
| 2. FTIR of <b>1-Cu<sub>3</sub></b>                        | S3  |
| 3. X-Ray Diffraction of <b>1-Cu<sub>3</sub></b>           | S4  |
| 4. Spin density surfaces of <b>1-Cu<sub>3</sub></b> .     | S10 |

## 1. Electrospray-Mass Spectrometry 1-Cu<sub>3</sub>

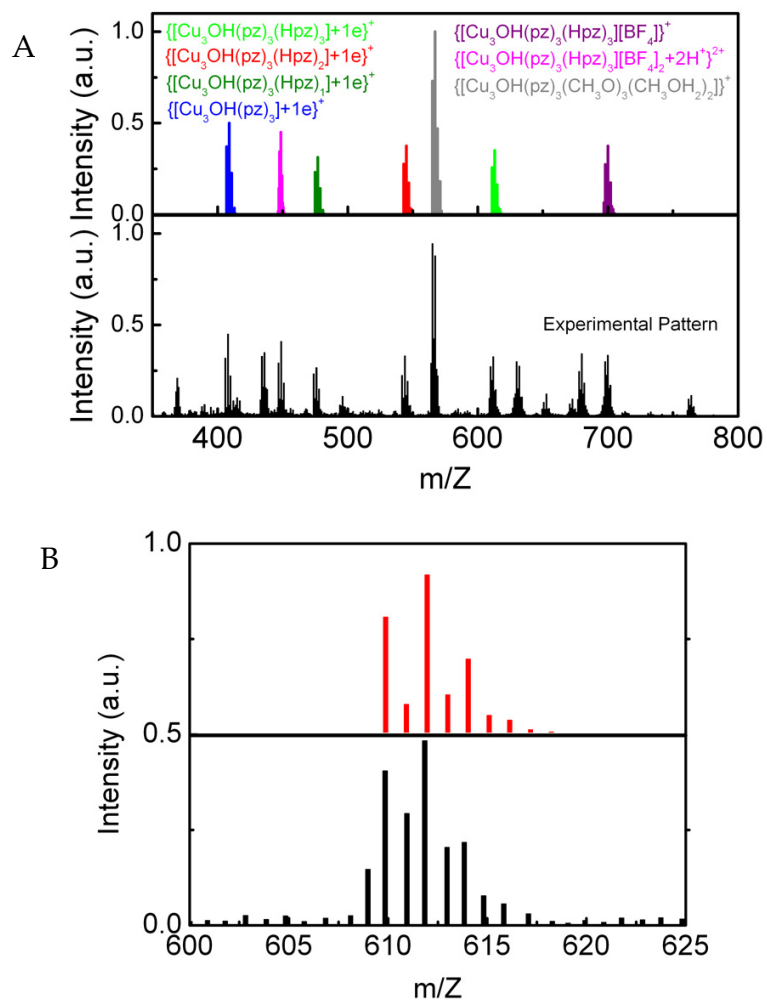

**Figure S1.** A. Electrospray-Mass Spectrum of 1-Cu<sub>3</sub> in the positive mode with the different simulated fragments patterns. B. Experimental (red) and simulated (black) pattern of the fragment  $\{[Cu_3(\mu_3-OH)(pz)_3(Hpz)_3]+1e\}^+$  ( $m/Z = 613$ ).

## 2. FTIR spectra of 1-Cu<sub>3</sub>

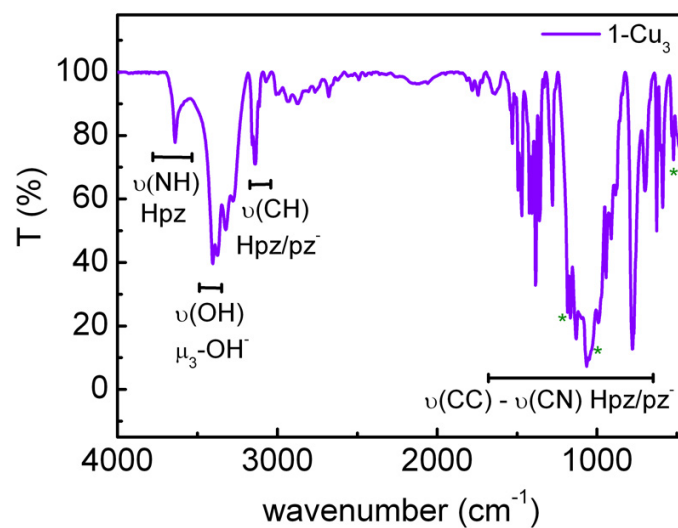

**Figure S2.** FTIR Spectrum of 1-Cu<sub>3</sub> highlighting the bands of the protonated (Hpz) and deprotonated (pz<sup>-</sup>) pyrazolato ligand. The stretching of the  $\mu_3$ -OH<sup>-</sup> unit is also observed. The green asterisks show the vibrations associated to the [BF<sub>4</sub>]<sup>-</sup> group.

### 3. X-Ray Diffraction of 1-Cu<sub>3</sub>

| <b>Table S1.</b> Crystal data and structure refinement for <b>1-Cu<sub>3</sub></b> . |                                                                                               |
|--------------------------------------------------------------------------------------|-----------------------------------------------------------------------------------------------|
| <b>Identification code</b>                                                           | <b>1-Cu<sub>3</sub></b>                                                                       |
| <b>CCDC</b>                                                                          | 2174487                                                                                       |
| <b>Empirical formula</b>                                                             | Cu <sub>3</sub> C <sub>18</sub> H <sub>22</sub> N <sub>12</sub> O <sub>2</sub> F <sub>8</sub> |
| <b>Formula weight</b>                                                                | 786.75                                                                                        |
| <b>Temperature/K</b>                                                                 | 293(2)                                                                                        |
| <b>Crystal system</b>                                                                | monoclinic                                                                                    |
| <b>Space group</b>                                                                   | P2 <sub>1</sub> /c                                                                            |
| <b>a/Å</b>                                                                           | 16.4768(17)                                                                                   |
| <b>b/Å</b>                                                                           | 10.4768(4)                                                                                    |
| <b>c/Å</b>                                                                           | 17.6691(10)                                                                                   |
| <b>α/°</b>                                                                           | 90                                                                                            |
| <b>β/°</b>                                                                           | 107.092(9)                                                                                    |
| <b>γ/°</b>                                                                           | 90                                                                                            |
| <b>Volume/Å<sup>3</sup></b>                                                          | 2915.4(4)                                                                                     |
| <b>Z</b>                                                                             | 4                                                                                             |
| <b>ρ<sub>calc</sub>/g/cm<sup>3</sup></b>                                             | 1.793                                                                                         |
| <b>μ/mm<sup>-1</sup></b>                                                             | 2.257                                                                                         |
| <b>F(000)</b>                                                                        | 1564.0                                                                                        |
| <b>Crystal size/mm<sup>3</sup></b>                                                   | 0.15 × 0.08 × 0.07                                                                            |
| <b>Radiation</b>                                                                     | MoKα (λ = 0.71073)                                                                            |
| <b>2θ range for data collection/°</b>                                                | 6.196 to 51.998                                                                               |
| <b>Index ranges</b>                                                                  | -20 ≤ h ≤ 17, -12 ≤ k ≤ 12, -21 ≤ l ≤ 21                                                      |
| <b>Reflections collected</b>                                                         | 23679                                                                                         |
| <b>Independent reflections</b>                                                       | 5713 [R <sub>int</sub> = 0.1041, R <sub>sigma</sub> = 0.1118]                                 |
| <b>Data/restraints/parameters</b>                                                    | 5713/4/413                                                                                    |
| <b>Goodness-of-fit on F<sup>2</sup></b>                                              | 1.010                                                                                         |
| <b>Final R indexes [I&gt;=2σ (I)]</b>                                                | R <sub>1</sub> = 0.0515, wR <sub>2</sub> = 0.0769                                             |
| <b>Final R indexes [all data]</b>                                                    | R <sub>1</sub> = 0.0997, wR <sub>2</sub> = 0.0930                                             |
| <b>Largest diff. peak/hole / e Å<sup>-3</sup></b>                                    | 0.62/-0.61                                                                                    |

**Table S2.** Fractional Atomic Coordinates ( $\times 10^4$ ) and Equivalent Isotropic Displacement Parameters ( $\text{\AA}^2 \times 10^3$ ) for 1–Cu3.  $U_{\text{eq}}$  is defined as 1/3 of the trace of the orthogonalised  $U_{ij}$  tensor.

| Atom | <i>x</i>  | <i>y</i>  | <i>z</i>   | $U(\text{eq})$ |
|------|-----------|-----------|------------|----------------|
| Cu1  | 1738.7(4) | 6996.5(5) | 4839.1(3)  | 15.06(17)      |
| Cu2  | 2756.7(5) | 4387.6(5) | 5773.9(4)  | 16.39(17)      |
| Cu3  | 2809.3(4) | 7117.4(5) | 6782.5(3)  | 15.24(17)      |
| F1   | 4681(2)   | 7419(3)   | 5236.8(17) | 32.8(9)        |
| F2   | 4035(2)   | 7437(3)   | 6212.2(16) | 29.5(9)        |
| F3   | 3956(2)   | 5662(3)   | 5455.1(16) | 24.5(8)        |
| F4   | 3241(2)   | 7461(3)   | 4926.1(17) | 27.6(8)        |
| F5   | 1474(2)   | 3175(3)   | 5942.1(18) | 29.5(8)        |
| F6   | 644(2)    | 3301(3)   | 6754.6(16) | 29.6(9)        |
| F7   | 27(2)     | 3187(3)   | 5435.3(17) | 35.3(9)        |
| F8   | 736(2)    | 5044(3)   | 5971.0(19) | 37.9(9)        |
| O1   | 2207(2)   | 6039(3)   | 5857.1(18) | 13.3(8)        |
| N1   | 2027(3)   | 8474(4)   | 6288(2)    | 15.8(10)       |
| N2   | 1606(3)   | 8424(4)   | 5496(2)    | 15.3(10)       |
| N3   | 1739(3)   | 5416(4)   | 4259(2)    | 15.8(10)       |
| N4   | 2184(3)   | 4375(4)   | 4634(2)    | 18.8(11)       |
| N5   | 3395(3)   | 5608(4)   | 7310(2)    | 18.9(11)       |
| N6   | 3299(3)   | 4459(4)   | 6923(2)    | 17.2(11)       |
| N7   | 4188(3)   | 8942(4)   | 7501(3)    | 21.9(11)       |
| N8   | 3511(3)   | 8321(4)   | 7612(2)    | 18.1(11)       |
| N9   | 1487(3)   | 8115(4)   | 3871(2)    | 18.4(11)       |
| N10  | 762(3)    | 8178(4)   | 3274(3)    | 23.2(11)       |
| N11  | 3266(3)   | 2676(4)   | 5710(2)    | 16.6(10)       |
| N12  | 2836(3)   | 1578(4)   | 5732(3)    | 18.2(11)       |
| C1   | 1754(4)   | 9509(4)   | 6586(3)    | 20.0(13)       |
| C2   | 1152(4)   | 10150(4)  | 6000(3)    | 21.3(14)       |
| C3   | 1084(4)   | 9435(4)   | 5320(3)    | 16.9(12)       |
| C4   | 1382(4)   | 5108(5)   | 3497(3)    | 21.9(14)       |
| C5   | 1585(4)   | 3857(5)   | 3364(3)    | 23.4(14)       |
| C6   | 2088(4)   | 3446(5)   | 4090(3)    | 24.6(15)       |
| C7   | 3663(4)   | 3563(5)   | 7449(3)    | 22.8(14)       |
| C8   | 4009(4)   | 4105(5)   | 8190(3)    | 24.6(14)       |
| C9   | 3823(4)   | 5392(5)   | 8073(3)    | 20.7(13)       |
| C10  | 4508(4)   | 9794(5)   | 8072(3)    | 28.3(15)       |
| C11  | 4035(4)   | 9744(5)   | 8590(3)    | 24.1(14)       |
| C12  | 3423(4)   | 8822(5)   | 8280(3)    | 20.9(14)       |
| C13  | 2003(4)   | 8959(5)   | 3685(3)    | 23.8(14)       |
| C14  | 1605(4)   | 9545(5)   | 2962(3)    | 32.1(16)       |
| C15  | 817(4)    | 9028(6)   | 2722(3)    | 35.9(17)       |
| C16  | 3986(4)   | 2332(5)   | 5585(3)    | 20.0(13)       |
| C17  | 4019(4)   | 1002(5)   | 5521(3)    | 24.9(14)       |
| C18  | 3284(4)   | 572(5)    | 5614(3)    | 27.6(15)       |
| B1   | 3997(4)   | 6995(5)   | 5448(3)    | 16.8(14)       |
| B2   | 710(5)    | 3687(6)   | 6010(4)    | 20.6(16)       |

**Table S3.** Anisotropic Displacement Parameters ( $\text{\AA}^2 \times 10^3$ ) for **1-Cu**. The Anisotropic displacement factor exponent takes the form:  $-2\pi^2[h^2a^{*2}U_{11}+2hka^*b^*U_{12}+\dots]$ .

| Atom | U <sub>11</sub> | U <sub>22</sub> | U <sub>33</sub> | U <sub>23</sub> | U <sub>13</sub> | U <sub>12</sub> |
|------|-----------------|-----------------|-----------------|-----------------|-----------------|-----------------|
| Cu1  | 20.1(4)         | 11.7(3)         | 13.2(3)         | 1.1(3)          | 4.5(3)          | 0.1(3)          |
| Cu2  | 21.4(4)         | 11.9(3)         | 15.9(3)         | 0.6(3)          | 5.6(3)          | 2.9(3)          |
| Cu3  | 17.9(4)         | 13.3(3)         | 13.7(3)         | 0.0(3)          | 3.4(3)          | -0.8(3)         |
| F1   | 25(2)           | 48(2)           | 30.5(18)        | -9.2(16)        | 14.9(18)        | -11.3(17)       |
| F2   | 40(2)           | 34.2(18)        | 18.6(16)        | -10.7(14)       | 14.8(18)        | -12.4(17)       |
| F3   | 24(2)           | 23.4(17)        | 24.0(17)        | -3.3(14)        | 4.5(16)         | 2.1(15)         |
| F4   | 25(2)           | 25.2(17)        | 30.8(18)        | 7.7(15)         | 4.6(17)         | 3.5(16)         |
| F5   | 24(2)           | 16.8(16)        | 53(2)           | 1.2(15)         | 19.9(19)        | 4.3(15)         |
| F6   | 40(2)           | 26.0(17)        | 24.0(17)        | -0.3(14)        | 12.0(18)        | -9.6(17)        |
| F7   | 31(2)           | 37(2)           | 31.5(18)        | -11.1(16)       | 0.3(18)         | -1.7(18)        |
| F8   | 37(3)           | 36(2)           | 44(2)           | -0.8(17)        | 17(2)           | -2.0(18)        |
| O1   | 14(2)           | 13.0(18)        | 13.9(18)        | -0.5(15)        | 5.3(18)         | -4.1(16)        |
| N1   | 19(3)           | 14(2)           | 14(2)           | -3.4(19)        | 4(2)            | -3(2)           |
| N2   | 16(3)           | 11(2)           | 18(2)           | 0.4(19)         | 4(2)            | -1(2)           |
| N3   | 18(3)           | 13(2)           | 17(2)           | -3.0(19)        | 5(2)            | -1(2)           |
| N4   | 22(3)           | 16(2)           | 18(2)           | 4(2)            | 5(2)            | 2(2)            |
| N5   | 19(3)           | 21(2)           | 15(2)           | 2(2)            | 3(2)            | 1(2)            |
| N6   | 25(3)           | 9(2)            | 18(2)           | 0.7(19)         | 7(2)            | 2(2)            |
| N7   | 24(3)           | 26(3)           | 19(3)           | -6(2)           | 10(2)           | -3(2)           |
| N8   | 14(3)           | 20(2)           | 19(2)           | 2(2)            | 2(2)            | -2(2)           |
| N9   | 21(3)           | 19(2)           | 15(2)           | 3(2)            | 6(2)            | 2(2)            |
| N10  | 17(3)           | 29(3)           | 21(3)           | 13(2)           | 3(3)            | 1(2)            |
| N11  | 19(3)           | 10(2)           | 23(2)           | -0.2(19)        | 10(2)           | -5(2)           |
| N12  | 15(3)           | 13(2)           | 28(3)           | 3(2)            | 10(3)           | -3(2)           |
| C1   | 31(4)           | 13(3)           | 18(3)           | -6(2)           | 10(3)           | -4(3)           |
| C2   | 25(4)           | 5(3)            | 36(3)           | -2(2)           | 12(3)           | 3(2)            |
| C3   | 20(3)           | 11(3)           | 21(3)           | 3(2)            | 7(3)            | 1(2)            |
| C4   | 26(4)           | 22(3)           | 16(3)           | -1(2)           | 3(3)            | 3(3)            |
| C5   | 33(4)           | 22(3)           | 12(3)           | -6(2)           | 3(3)            | -2(3)           |
| C6   | 39(4)           | 13(3)           | 22(3)           | -7(2)           | 9(3)            | 3(3)            |
| C7   | 32(4)           | 17(3)           | 22(3)           | 1(2)            | 12(3)           | 5(3)            |
| C8   | 24(4)           | 29(3)           | 19(3)           | 8(3)            | 2(3)            | 5(3)            |
| C9   | 18(4)           | 28(3)           | 16(3)           | -4(2)           | 4(3)            | 1(3)            |
| C10  | 30(4)           | 29(3)           | 22(3)           | -10(3)          | 2(3)            | -12(3)          |
| C11  | 22(4)           | 26(3)           | 21(3)           | -7(3)           | 1(3)            | 0(3)            |
| C12  | 28(4)           | 31(3)           | 6(3)            | 0(2)            | 8(3)            | 4(3)            |
| C13  | 18(4)           | 25(3)           | 28(3)           | 7(3)            | 6(3)            | -3(3)           |
| C14  | 25(4)           | 37(4)           | 35(4)           | 25(3)           | 10(3)           | 2(3)            |
| C15  | 28(4)           | 50(4)           | 28(3)           | 26(3)           | 6(3)            | 10(3)           |
| C16  | 13(3)           | 22(3)           | 24(3)           | 0(2)            | 3(3)            | 3(3)            |
| C17  | 30(4)           | 16(3)           | 29(3)           | -4(3)           | 11(3)           | 10(3)           |
| C18  | 39(4)           | 12(3)           | 32(3)           | 0(3)            | 10(3)           | 5(3)            |
| B1   | 18(4)           | 14(3)           | 21(3)           | 2(3)            | 9(3)            | 2(3)            |
| B2   | 26(5)           | 15(3)           | 22(4)           | 2(3)            | 9(4)            | -3(3)           |

| Table S4. Bond Lengths for 1-Cu3. |      |          |  |      |      |          |
|-----------------------------------|------|----------|--|------|------|----------|
| Atom                              | Atom | Length/Å |  | Atom | Atom | Length/Å |
| Cu1                               | F4   | 2.482(3) |  | N3   | N4   | 1.371(5) |
| Cu1                               | O1   | 2.005(3) |  | N3   | C4   | 1.341(6) |
| Cu1                               | N2   | 1.945(4) |  | N4   | C6   | 1.344(6) |
| Cu1                               | N3   | 1.948(4) |  | N5   | N6   | 1.371(5) |
| Cu1                               | N9   | 2.013(4) |  | N5   | C9   | 1.344(6) |
| Cu2                               | F3   | 2.580(3) |  | N6   | C7   | 1.333(6) |
| Cu2                               | F5   | 2.556(3) |  | N7   | N8   | 1.354(6) |
| Cu2                               | O1   | 1.978(3) |  | N7   | C10  | 1.334(6) |
| Cu2                               | N4   | 1.957(4) |  | N8   | C12  | 1.339(5) |
| Cu2                               | N6   | 1.965(4) |  | N9   | N10  | 1.342(6) |
| Cu2                               | N11  | 1.997(4) |  | N9   | C13  | 1.333(6) |
| Cu3                               | F2   | 2.531(3) |  | N10  | C15  | 1.344(6) |
| Cu3                               | O1   | 1.995(3) |  | N11  | N12  | 1.358(5) |
| Cu3                               | N1   | 1.945(4) |  | N11  | C16  | 1.319(6) |
| Cu3                               | N5   | 1.943(4) |  | N12  | C18  | 1.338(6) |
| Cu3                               | N8   | 2.019(4) |  | C1   | C2   | 1.380(7) |
| F1                                | B1   | 1.362(7) |  | C2   | C3   | 1.391(6) |
| F2                                | B1   | 1.412(6) |  | C4   | C5   | 1.390(7) |
| F3                                | B1   | 1.398(6) |  | C5   | C6   | 1.375(7) |
| F4                                | B1   | 1.401(7) |  | C7   | C8   | 1.386(7) |
| F5                                | B2   | 1.407(7) |  | C8   | C9   | 1.384(7) |
| F6                                | B2   | 1.410(6) |  | C10  | C11  | 1.367(7) |
| F7                                | B2   | 1.379(7) |  | C11  | C12  | 1.388(7) |
| F8                                | B2   | 1.425(6) |  | C13  | C14  | 1.396(7) |
| N1                                | N2   | 1.369(5) |  | C14  | C15  | 1.355(8) |
| N1                                | C1   | 1.338(6) |  | C16  | C17  | 1.401(7) |
| N2                                | C3   | 1.342(6) |  | C17  | C18  | 1.347(8) |

| Table S5. Bond Angles for 1–Cu <sub>3</sub> . |      |      |            |      |      |      |           |
|-----------------------------------------------|------|------|------------|------|------|------|-----------|
| Atom                                          | Atom | Atom | Angle (°)  | Atom | Atom | Atom | Angle (°) |
| O1                                            | Cu1  | F4   | 85.92(12)  | N3   | N4   | Cu2  | 121.3(3)  |
| O1                                            | Cu1  | N9   | 169.14(17) | C6   | N4   | Cu2  | 131.4(4)  |
| N2                                            | Cu1  | F4   | 95.57(15)  | C6   | N4   | N3   | 107.2(4)  |
| N2                                            | Cu1  | O1   | 86.03(15)  | N6   | N5   | Cu3  | 120.5(3)  |
| N2                                            | Cu1  | N3   | 170.27(17) | C9   | N5   | Cu3  | 131.2(3)  |
| N2                                            | Cu1  | N9   | 91.58(16)  | C9   | N5   | N6   | 107.6(4)  |
| N3                                            | Cu1  | F4   | 92.57(15)  | N5   | N6   | Cu2  | 120.0(3)  |
| N3                                            | Cu1  | O1   | 89.24(15)  | C7   | N6   | Cu2  | 132.0(3)  |
| N3                                            | Cu1  | N9   | 94.61(16)  | C7   | N6   | N5   | 107.9(4)  |
| N9                                            | Cu1  | F4   | 83.78(15)  | C10  | N7   | N8   | 111.9(4)  |
| F5                                            | Cu2  | F3   | 174.02(10) | N7   | N8   | Cu3  | 121.0(3)  |
| O1                                            | Cu2  | F3   | 87.72(11)  | C12  | N8   | Cu3  | 134.2(4)  |
| O1                                            | Cu2  | F5   | 90.80(12)  | C12  | N8   | N7   | 104.3(4)  |
| O1                                            | Cu2  | N11  | 177.04(15) | N10  | N9   | Cu1  | 127.6(3)  |
| N4                                            | Cu2  | F3   | 86.97(14)  | C13  | N9   | Cu1  | 127.5(4)  |
| N4                                            | Cu2  | F5   | 87.22(15)  | C13  | N9   | N10  | 104.9(4)  |
| N4                                            | Cu2  | O1   | 89.40(16)  | N9   | N10  | C15  | 111.7(5)  |
| N4                                            | Cu2  | N6   | 177.55(18) | N12  | N11  | Cu2  | 121.9(3)  |
| N4                                            | Cu2  | N11  | 91.12(17)  | C16  | N11  | Cu2  | 132.0(3)  |
| N6                                            | Cu2  | F3   | 93.53(14)  | C16  | N11  | N12  | 106.0(4)  |
| N6                                            | Cu2  | F5   | 92.22(15)  | C18  | N12  | N11  | 110.3(5)  |
| N6                                            | Cu2  | O1   | 88.22(15)  | N1   | C1   | C2   | 110.5(4)  |
| N6                                            | Cu2  | N11  | 91.21(17)  | C1   | C2   | C3   | 104.1(4)  |
| N11                                           | Cu2  | F3   | 95.21(14)  | N2   | C3   | C2   | 110.0(5)  |
| N11                                           | Cu2  | F5   | 86.32(14)  | N3   | C4   | C5   | 109.9(5)  |
| O1                                            | Cu3  | F2   | 90.67(12)  | C6   | C5   | C4   | 104.3(5)  |
| O1                                            | Cu3  | N8   | 171.50(15) | N4   | C6   | C5   | 110.6(5)  |
| N1                                            | Cu3  | F2   | 103.06(14) | N6   | C7   | C8   | 110.2(5)  |
| N1                                            | Cu3  | O1   | 86.65(15)  | C9   | C8   | C7   | 104.3(5)  |
| N1                                            | Cu3  | N8   | 91.84(17)  | N5   | C9   | C8   | 110.0(5)  |
| N5                                            | Cu3  | F2   | 87.52(15)  | N7   | C10  | C11  | 107.6(5)  |
| N5                                            | Cu3  | O1   | 89.41(16)  | C10  | C11  | C12  | 104.8(5)  |
| N5                                            | Cu3  | N1   | 168.74(18) | N8   | C12  | C11  | 111.4(5)  |
| N5                                            | Cu3  | N8   | 93.57(17)  | N9   | C13  | C14  | 110.9(5)  |
| N8                                            | Cu3  | F2   | 81.52(14)  | C15  | C14  | C13  | 105.0(5)  |
| B1                                            | F2   | Cu3  | 121.4(3)   | N10  | C15  | C14  | 107.5(5)  |
| B1                                            | F3   | Cu2  | 124.1(3)   | N11  | C16  | C17  | 110.1(5)  |
| B1                                            | F4   | Cu1  | 130.5(3)   | C18  | C17  | C16  | 105.4(5)  |
| B2                                            | F5   | Cu2  | 127.7(3)   | N12  | C18  | C17  | 108.2(5)  |
| Cu2                                           | O1   | Cu1  | 115.77(15) | F1   | B1   | F2   | 110.3(5)  |
| Cu2                                           | O1   | Cu3  | 115.33(18) | F1   | B1   | F3   | 112.0(5)  |
| Cu3                                           | O1   | Cu1  | 114.79(15) | F1   | B1   | F4   | 110.7(4)  |
| N2                                            | N1   | Cu3  | 120.1(3)   | F3   | B1   | F2   | 107.9(4)  |
| C1                                            | N1   | Cu3  | 132.1(4)   | F3   | B1   | F4   | 108.5(5)  |
| C1                                            | N1   | N2   | 107.8(4)   | F4   | B1   | F2   | 107.2(4)  |
| N1                                            | N2   | Cu1  | 121.9(3)   | F5   | B2   | F6   | 106.6(5)  |
| C3                                            | N2   | Cu1  | 130.2(4)   | F5   | B2   | F8   | 109.6(5)  |
| C3                                            | N2   | N1   | 107.7(4)   | F6   | B2   | F8   | 110.1(4)  |
| N4                                            | N3   | Cu1  | 120.3(3)   | F7   | B2   | F5   | 110.5(4)  |
| C4                                            | N3   | Cu1  | 131.6(4)   | F7   | B2   | F6   | 108.0(5)  |
| C4                                            | N3   | N4   | 108.0(4)   | F7   | B2   | F8   | 111.9(5)  |



| Table S6. Hydrogen Atom Coordinates ( $\text{\AA}\times 10^4$ ) and Isotropic Displacement Parameters ( $\text{\AA}^2\times 10^3$ ) for 1-Cu <sub>3</sub> . |          |          |          |        |
|-------------------------------------------------------------------------------------------------------------------------------------------------------------|----------|----------|----------|--------|
| Atom                                                                                                                                                        | <i>x</i> | <i>y</i> | <i>z</i> | U(eq)  |
| H1A                                                                                                                                                         | 1666(12) | 5780(40) | 5950(20) | 17(14) |
| H7A                                                                                                                                                         | 4350(20) | 8750(50) | 7092(14) | 50(20) |
| H10A                                                                                                                                                        | 300(14)  | 7770(40) | 3250(30) | 40(20) |
| H12A                                                                                                                                                        | 2345(11) | 1590(50) | 5810(20) | 30(18) |
| H1                                                                                                                                                          | 1944.51  | 9760.32  | 7113.38  | 24     |
| H2                                                                                                                                                          | 858.41   | 10889.11 | 6047.66  | 26     |
| H3                                                                                                                                                          | 729.9    | 9629.67  | 4818.09  | 20     |
| H4                                                                                                                                                          | 1048.33  | 5651.81  | 3114.3   | 26     |
| H5                                                                                                                                                          | 1418.17  | 3400.65  | 2891.84  | 28     |
| H6                                                                                                                                                          | 2328.93  | 2637.76  | 4190.08  | 30     |
| H7                                                                                                                                                          | 3683.21  | 2699.01  | 7335.6   | 27     |
| H8                                                                                                                                                          | 4300.15  | 3697.28  | 8658.59  | 30     |
| H9                                                                                                                                                          | 3972.63  | 6014.42  | 8464.75  | 25     |
| H10                                                                                                                                                         | 4970.78  | 10325.77 | 8110.7   | 34     |
| H11                                                                                                                                                         | 4106.55  | 10223.03 | 9047.81  | 29     |
| H12                                                                                                                                                         | 3003.97  | 8582.04  | 8508.5   | 25     |
| H13                                                                                                                                                         | 2553.2   | 9133.52  | 3995.6   | 29     |
| H14                                                                                                                                                         | 1831.72  | 10157.85 | 2701.11  | 39     |
| H15                                                                                                                                                         | 391.73   | 9225.91  | 2259.48  | 43     |
| H16                                                                                                                                                         | 4409.67  | 2891.19  | 5544.29  | 24     |
| H17                                                                                                                                                         | 4455.93  | 518.13   | 5432.55  | 30     |
| H18                                                                                                                                                         | 3116.75  | -277.74  | 5598.45  | 33     |

#### 4. Spin density surfaces of 1-Cu<sub>3</sub>.

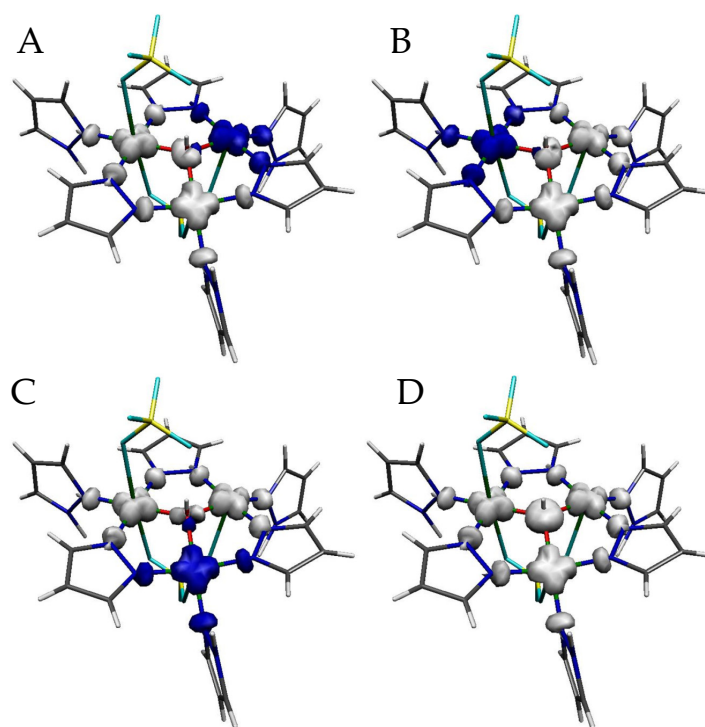

**Figure S3.** Spin density surfaces for 1-Cu<sub>3</sub> of the antiferromagnetic configurations (A-C) and the ferromagnetic one (D). Grey colour corresponds to alpha spin density and blue colour to beta spin density
